# Supplementary material
Source: PubMed Central journal article supplement (PMC6440867)
Supplement: NIHMS1516655-supplement-1.pdf [file NIHMS1516655-supplement-1.pdf]

## **SUPPLEMENTAL MATERIAL:**

### **Exclusion Criteria:**

- Recurrent disease within 12 months after completion of adjuvant chemotherapy containing a weekly taxane
- Active, untreated CNS metastases
- Pre-existing nephritic syndrome
- Serious concurrent medical or psychiatric illness
- Inadequately controlled hypertension (defined as systolic blood pressure >150 and/or diastolic blood pressure > 100 mmHg on antihypertensive medications)
- NHYA Grade II or greater CHF, significant vascular disease
- Symptomatic peripheral vascular disease
- Bleeding diathesis or coagulopathy
- Major surgery within 28 days prior to enrollment and or anticipated needed during the course of the study
- Minor surgery within 7 days prior to enrollment
- Serious non-healing wounds or bone fractures
- Proteinuria at screening (defined as urine protein: creatinine ratio >1.0 or urine dipstick with 2+ proteinuria)
- Any of the following within 6 months prior to study enrollment: myocardial infarction, unstable angina, stroke, transient ischemic attack, abdominal fistula, gastrointestinal perforation, or intra-abdominal abscess.

**Supplemental Table 1: All Grade 3,4 Toxicities Definitely or Probably Related to Treatment**

| <b>Grade 3,4 Toxicities</b>        | <b>Induction (N=59)<br/>#, (% of patients)</b> | <b>Maintenance (N=30)<br/>#, (% of patients)</b> |
|------------------------------------|------------------------------------------------|--------------------------------------------------|
| Allergic Reaction                  | 1 (1.7%)                                       |                                                  |
| Anemia                             | 2 (3.4%)                                       |                                                  |
| Anorexia                           |                                                | 1 (3.3%)                                         |
| Constipation                       | 1 (1.7%)                                       |                                                  |
| Dehydration                        | 2 (3.4%)                                       | 1 (3.3%)                                         |
| Dermatology-Other                  | 1 (1.7%)                                       |                                                  |
| Diarrhea                           | 1 (1.7%)                                       |                                                  |
| Fatigue                            | 11 (18.6%)                                     | 1 (3.3%)                                         |
| Hemorrhage                         | 1 (1.7%)                                       |                                                  |
| Hypertension                       | 1 (1.7%)                                       |                                                  |
| Infection                          | 1 (1.7%)                                       |                                                  |
| Liver Function Test<br>Abnormality |                                                | 1 (3.3%)                                         |
| Lymphopenia                        | 5 (8.5%)                                       | 1 (3.3%)                                         |
| Muscle Weakness                    | 1 (1.7%)                                       |                                                  |
| Nail Changes                       | 2 (3.3%)                                       |                                                  |
| Nausea/Vomiting                    | 2 (3.3%)                                       |                                                  |
| Neuropathy                         | 7 (11.9%)                                      |                                                  |
| Neutropenia                        | 15 (25.4%)                                     |                                                  |
| Pain                               | 2 (3.3%)                                       | 1 (3.3%)                                         |
| Patient Odor                       | 1 (1.7%)                                       |                                                  |
| Proteinuria                        | 1 (1.7%)                                       |                                                  |
| Rash                               |                                                | 3 (10.0%)                                        |
| Syncope                            | 1 (1.7%)                                       |                                                  |

**Supplemental Table 1:** Summary of grade 3-4 toxicities during induction (N=59, safety cohort) and maintenance phase (N=30) reported using NCI CTC (Common Terminology Criteria) Version 3.0 ([http://ctep.cancer.gov/protocolDevelopment/electronic\\_applications/docs/ctcae3.pdf](http://ctep.cancer.gov/protocolDevelopment/electronic_applications/docs/ctcae3.pdf)). Toxicities that were either definitely or probably related to study drugs are shown above. The values in the Induction/Maintenance columns indicate the number and the percent of patients that experienced a given toxicity. There were no grade 5 toxicities.

**Supplemental Table 2: Grade 3,4 Toxicities Possibly Related to Treatment**

| <b>Grade 3,4 Toxicities</b> | <b>Induction (N=59)<br/>#, (% of patients)</b> | <b>Maintenance (N=30)<br/>#, (% of patients)</b> |
|-----------------------------|------------------------------------------------|--------------------------------------------------|
| Anorexia                    | 1 (1.7%)                                       |                                                  |
| CHF                         |                                                | 1 (3.3%)                                         |
| Constitutional-Other        | 1 (1.7)                                        |                                                  |
| Dysphagia                   | 1 (1.7%)                                       |                                                  |
| Fatigue                     | 3 (5.1%)                                       |                                                  |
| Hemorrhage                  | 1 (1.7%)                                       |                                                  |
| Hyperglycemia               | 1 (1.7%)                                       |                                                  |
| Hypertension                | 1 (1.7%)                                       |                                                  |
| Hyponatremia                | 2 (3.3%)                                       |                                                  |
| Hypophosphatemia            | 1(1.7%)                                        |                                                  |
| Hypoxia                     | 1 (1.7%)                                       |                                                  |
| Infection                   |                                                | 2 (6.6%)                                         |
| Neutropenia                 |                                                | 1 (3.3%)                                         |
| Pain                        | 1 (1.7%)                                       | 1 (3.3%)                                         |
| Rash                        |                                                | 1 (3.3%)                                         |
| Thrombocytopenia            | 2 (3.3%)                                       |                                                  |
| Thrombosis                  | 2 (3.3%)                                       |                                                  |

**Supplemental Table 2:** Summary of grade 3-4 toxicities during induction (N=59, safety cohort) and maintenance phase (N=30) reported using NCI CTC (Common Terminology Criteria) Version 3.0 ([http://ctep.cancer.gov/protocolDevelopment/electronic\\_applications/docs/ctcaev3.pdf](http://ctep.cancer.gov/protocolDevelopment/electronic_applications/docs/ctcaev3.pdf)). Toxicities that are possibly related to study drugs are shown above. The values in the Induction/Maintenance columns indicate the number and the percent of patients that experienced a given toxicity. There were no grade 5 toxicities.

### Supplemental Figure 1: Progression Free Survival

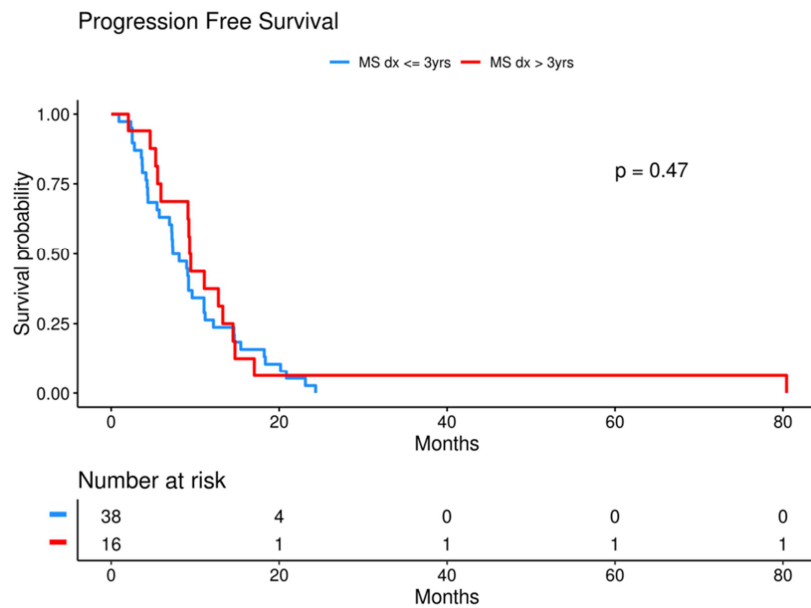

**Supplemental Figure 1:** Difference in PFS based on time to metastasis defined as greater or less than 3 years (=0.47)

**Supplemental Figure 2: Overall Survival**

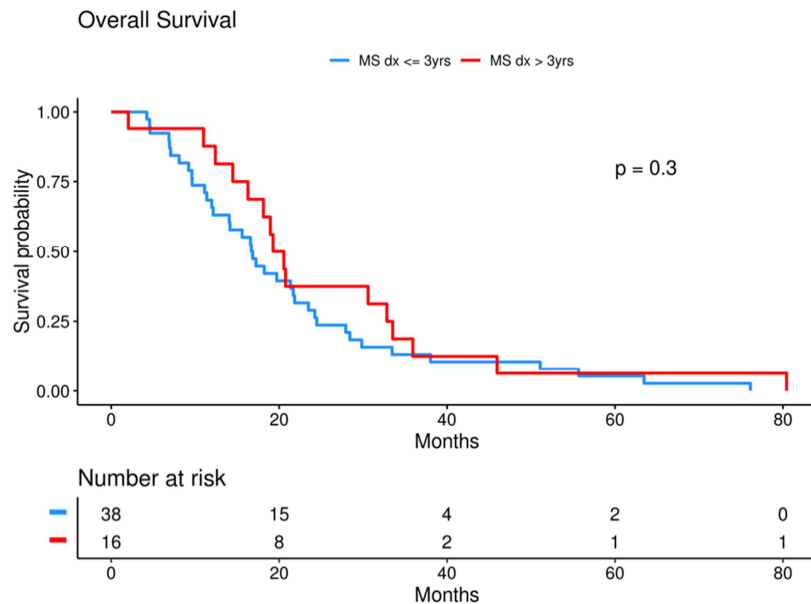

**Supplemental Figure 2:** Difference in overall survival based on time to metastasis defined as greater or less than 3 years (=0.3)

**Supplemental Figure 3: Progression Free Survival**

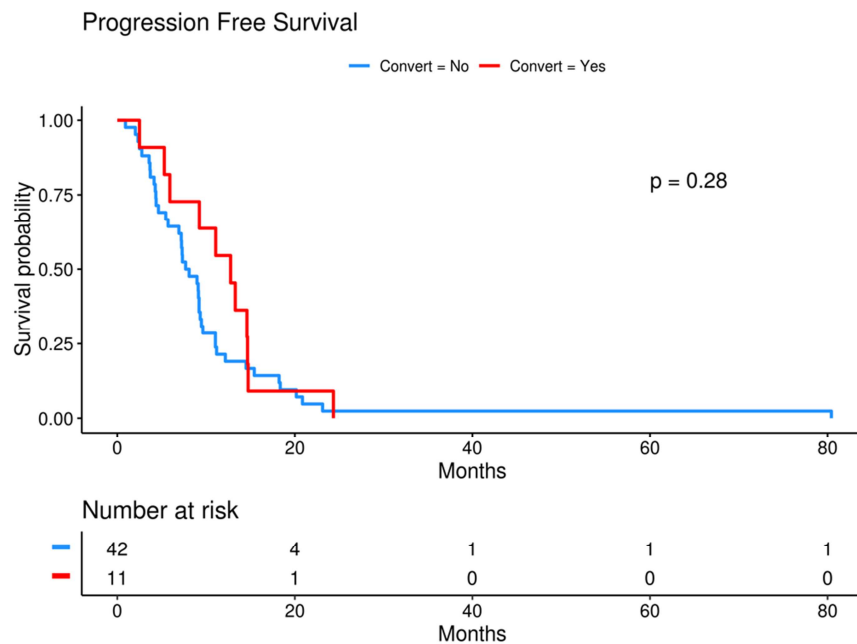

Supplemental Figure 3: Difference in PFS based on whether patients presented with TNBC or converted from another subtype ( $p=0.28$ ).

#### Supplemental Figure 4: Overall Survival

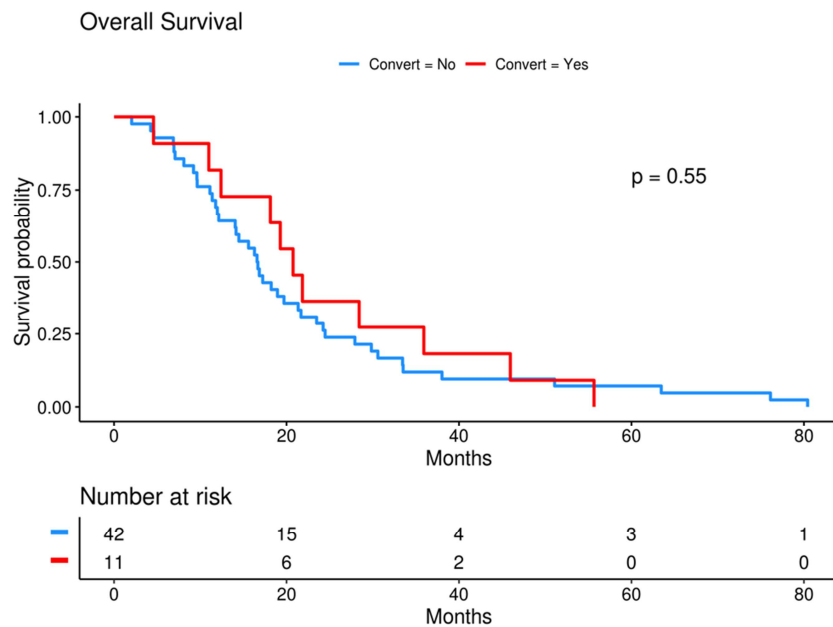

Supplemental Figure 4: Difference in OS based on whether patients presented with TNBC or converted from another subtype ( $p=0.55$ ).
